# Supplementary material for: Water-Based Extraction of Bioactive Principles from Blackcurrant Leaves and Chrysanthellum americanum: A Comparative Study
Source: PubMed Central journal article supplement (PMC7602794; doi:10.3390/foods9101478), 2020-10-16
Supplement: foods-09-01478-s001.pdf [file foods-09-01478-s001.pdf]

## SUPPORTING INFORMATION

### Table of contents

|                                                                                                                                                                                                                                |     |
|--------------------------------------------------------------------------------------------------------------------------------------------------------------------------------------------------------------------------------|-----|
| <b>Figure S1.</b> Pictures of raw and grinded CA (top) and BC (bottom) materials of various granulometries. One small square on the pictures is 1 mm large (see also the scale on the picture). .....                          | S1  |
| <b>Figure S2.</b> Mass spectra achieved by ESI(-) FT-ICR MS analysis of BC (A), CA (B), and HAW (C) with their corresponding heteroatom class distribution and van Krevelen diagram.. .....                                    | S2  |
| <b>Figure S3.</b> Chemical structures of all compounds identified by UHPLC-ESI-MS. ....                                                                                                                                        | S4  |
| <b>Figure S4.</b> UHPLC profiles of two lots (55870 and NH558024) of BC infusion extracts obtained using Bodum® recipient.....                                                                                                 | S7  |
| <b>Figure S5.</b> UHPLC profiles of three lots (559980, CB44120 and NH558088) of CA infusion extracts obtained using Bodum® recipient.....                                                                                     | S7  |
| <b>Figure S6.</b> Example of electropherograms showing the inhibitory effect of two extracts on hyaluronidase.....                                                                                                             | S8  |
| <b>Figure S7.</b> Decreasing temperature profiles vs time for different volumes of water (corresponding to a mug 250 mL or a bowl 405 mL) in the French-press Bodum® container with or without added ice in the container..... | S9  |
| <b>Table S1.</b> Some species putatively assigned to m/z peaks observed specifically in BC, CA and HAW samples but also commonly observed in all the samples analyzed by ESI(-) FT-ICR MS.....                                 | S10 |
| <b>Table S2.</b> Inhibition assays of hyaluronidase and ACE as well as the ABTS antioxidant capacity assay of the different plant extracts. ....                                                                               | S14 |

*Figure S1. Pictures of raw and grinded CA (top) and BC (bottom) materials of various granulometries. One small square on the pictures is 1 mm large (see also the scale on the picture).*

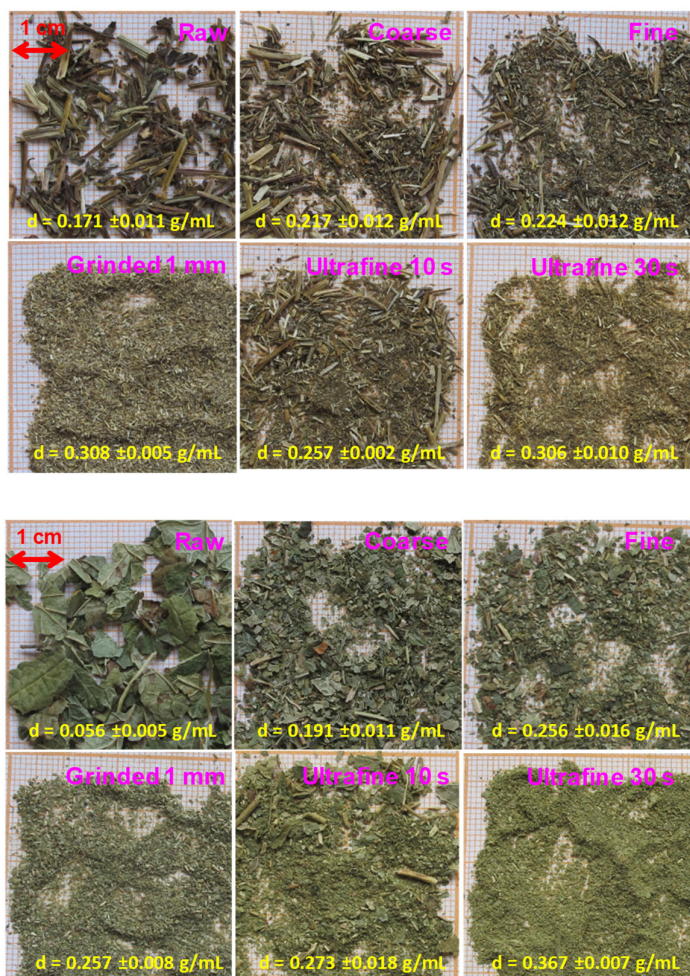

**Figure S2.** Mass spectra achieved by ESI(-) FT-ICR MS analysis of BC (A), CA (B), and HAW (C) with their corresponding heteroatom class distribution and van Krevelen diagram. The size of the plots is relative to the peak intensity. See Table 1 for the list of all lot numbers investigated in this work.

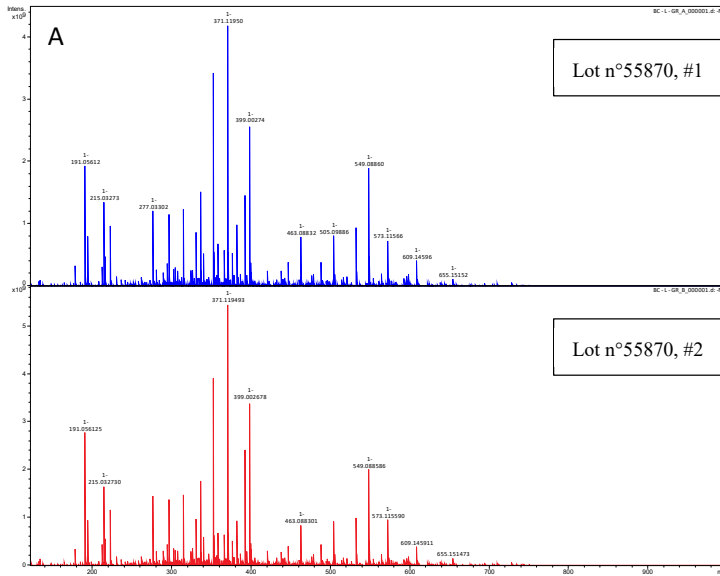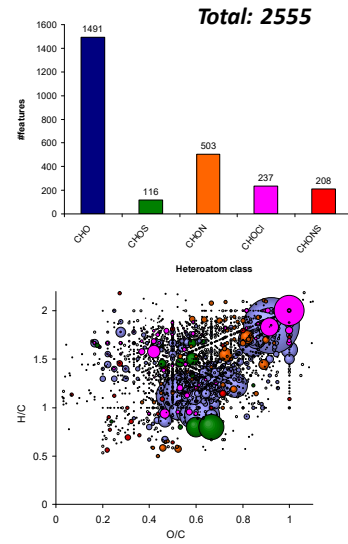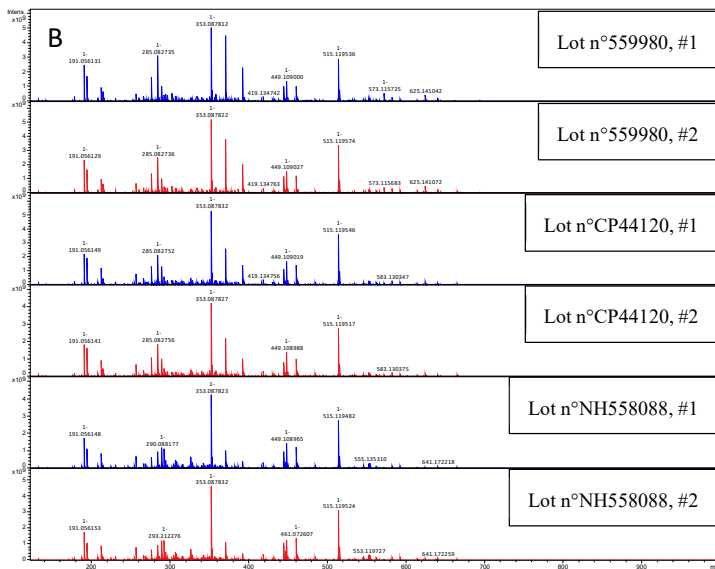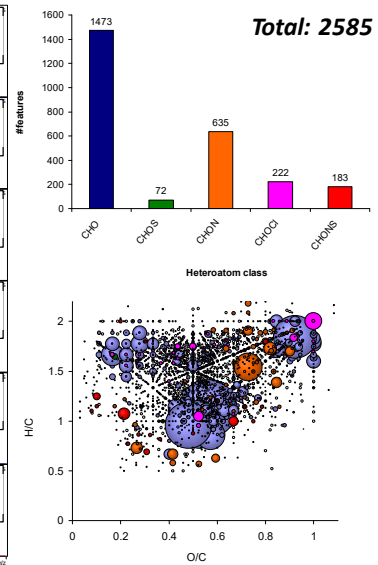

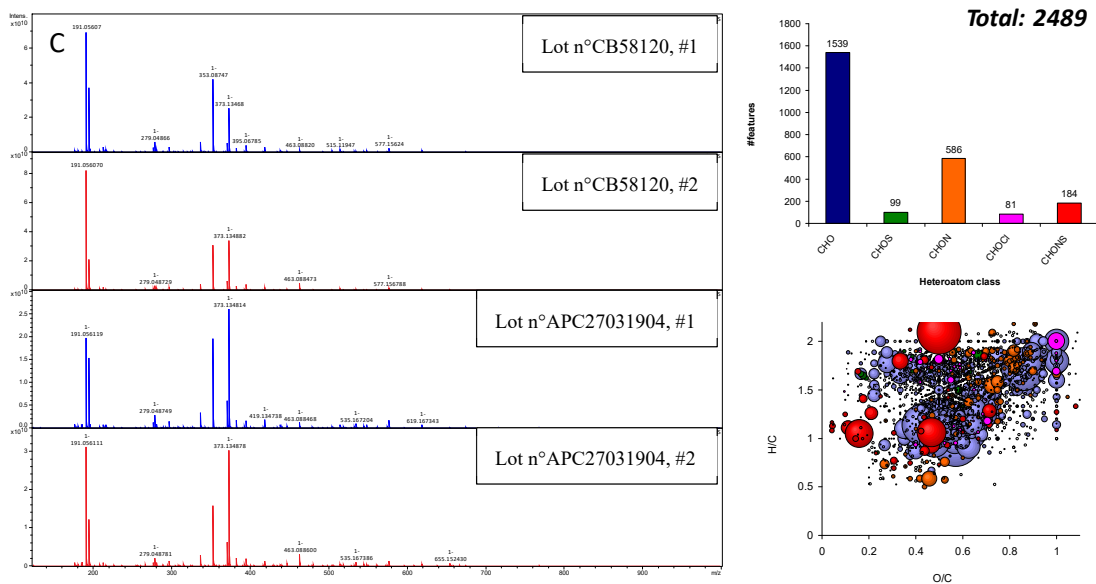

Figure S3. Chemical structures of all compounds identified by UHPLC-ESI-MS.

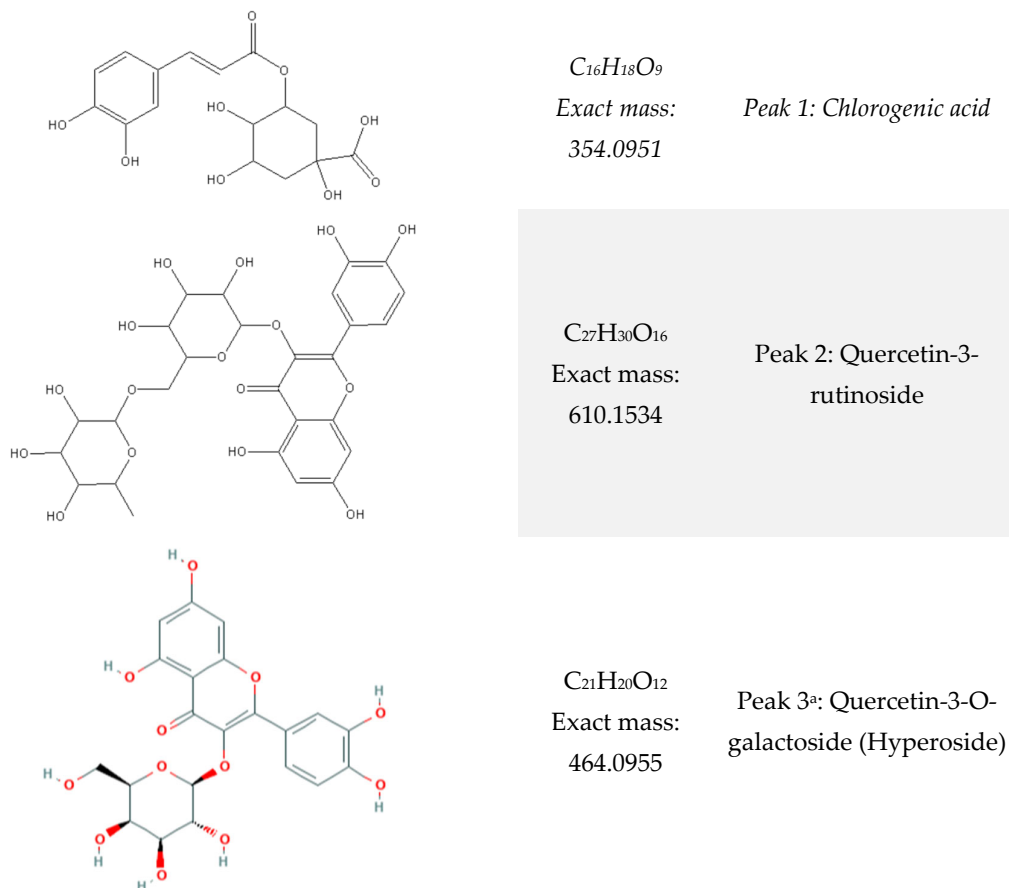

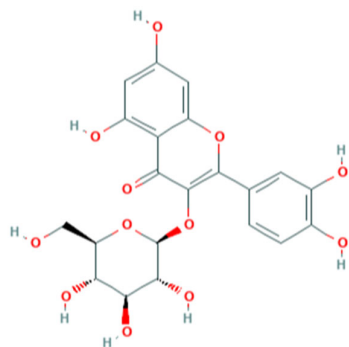

$C_{21}H_{20}O_{12}$   
Exact mass:  
464.0955

Peak 3<sup>b</sup>: Quercetin-3-O-  
glucoside  
(Isoquercetin)

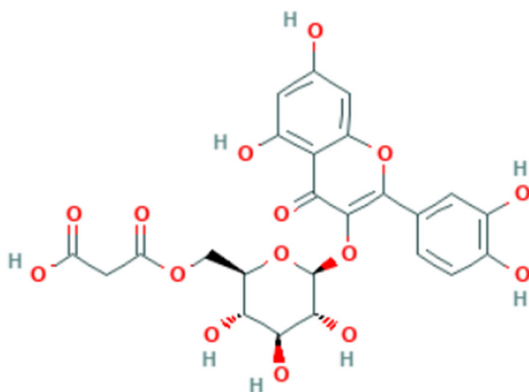

$C_{24}H_{22}O_{15}$   
Exact mass:  
550.0959

Peak 4<sup>a</sup>: Quercetin-3-6-  
O-malonyl-glucoside

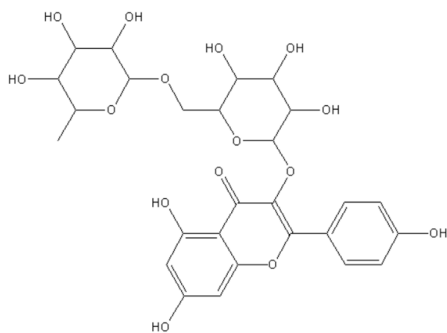

$C_{27}H_{30}O_{15}$   
Exact mass:  
594.1585

Peak 4<sup>b</sup>: Kaempferol-3-  
O-rutinoside

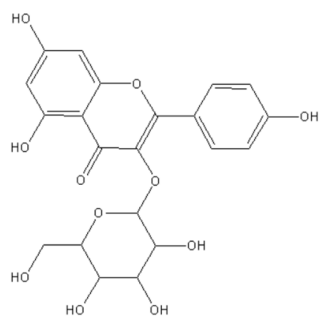

$C_{21}H_{20}O_{11}$   
Exact mass:  
448.1006

Peak 5: Kaempferol-3-O-  
hexoside

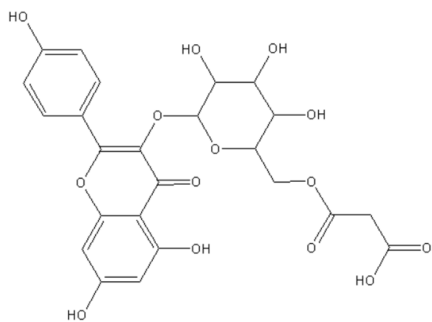

$C_{24}H_{22}O_{14}$   
Exact mass:  
534.101

Peak 6 and 7:  
Kaempferol-malonyl-  
glucoside and  
Kaempferol-malonyl-  
glucoside isomers

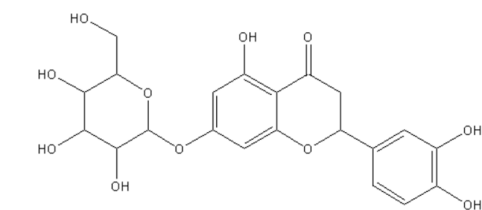

$C_{21}H_{22}O_{11}$   
Exact mass:  
450.1162

Peak 8<sup>a</sup>: Eriodicyol-7-O-glucoside

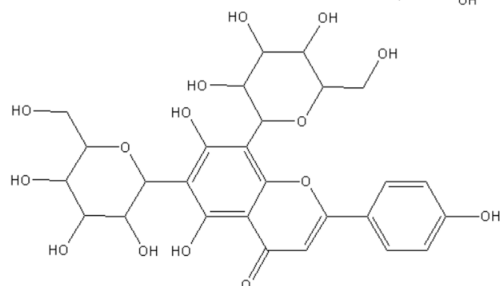

$C_{27}H_{30}O_{15}$   
Exact mass:  
594.1585

Peak 8<sup>b</sup>: 6,8-C-diglucosylapigenin

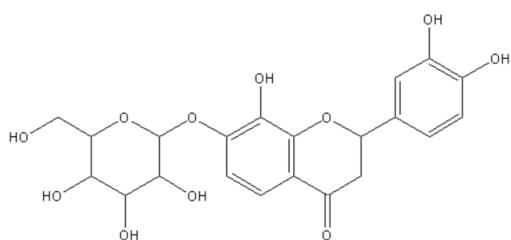

$C_{21}H_{22}O_{11}$   
Exact mass:  
450.1162

Peak 9: Isookanin-7-O-glucoside  
(Flavonomarein)

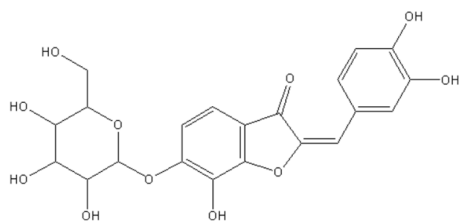

$C_{21}H_{20}O_{11}$   
Exact mass:  
448.1006

Peak 10: Maritimetin-6-O-glucoside  
(Martitimein)

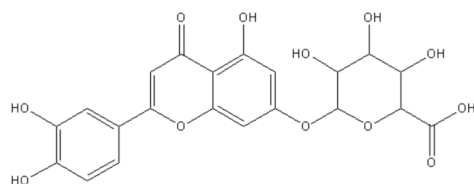

$C_{21}H_{18}O_{12}$   
Exact mass:  
462.0798

Peak 11: Luteolin-7-O-glucuronide

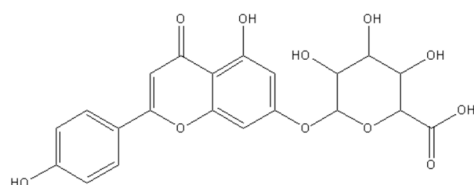

$C_{21}H_{18}O_{11}$   
Exact mass:  
446.0849

Peak 14: Apigenin-7-glucuronide

Peak 12, 13 and 15: three of six following isomers of di-caffeoylquinic acids

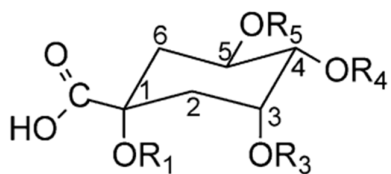

Quinic acid

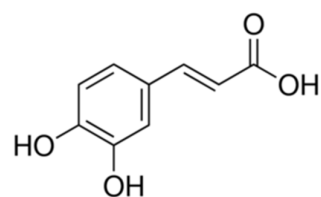

C = Caffeic acid

| Name                          | R <sub>1</sub> | R <sub>3</sub> | R <sub>4</sub> | R <sub>5</sub> |
|-------------------------------|----------------|----------------|----------------|----------------|
| 1,3-di-O- caffeoylquinic acid | C              | C              | H              | H              |
| 1,4-di-O- caffeoylquinic acid | C              | H              | C              | H              |
| 1,5-di-O- caffeoylquinic acid | C              | H              | H              | C              |
| 3,4-di-O- caffeoylquinic acid | H              | C              | C              | H              |
| 3,5-di-O- caffeoylquinic acid | H              | C              | H              | C              |
| 4,5-di-O- caffeoylquinic acid | H              | H              | C              | C              |

**Figure S4.** UHPLC profiles of two lots (55870 and NH558024) of BC infusion extracts obtained using Bodum® recipient.

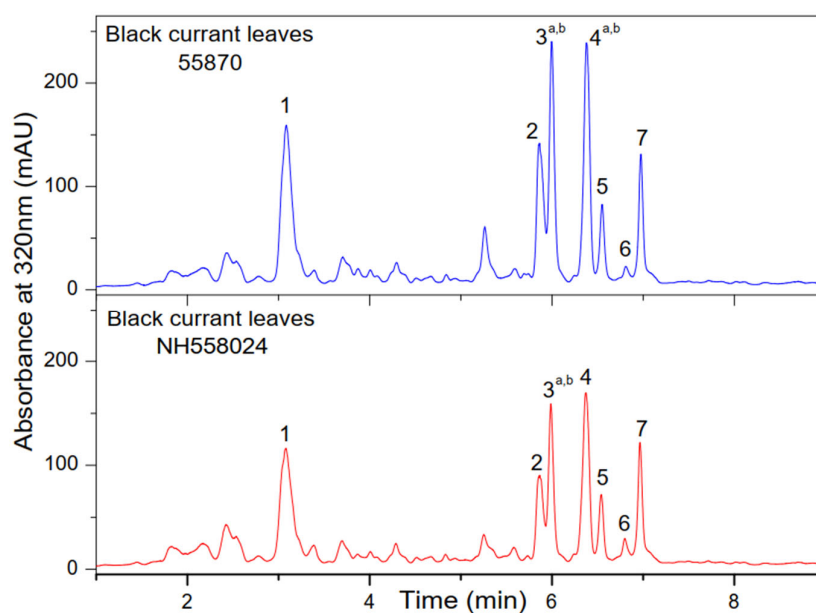

**Figure S5.** UHPLC profiles of three lots (559980, CB44120 and NH558088) of CA infusion extracts obtained using Bodum® recipient.

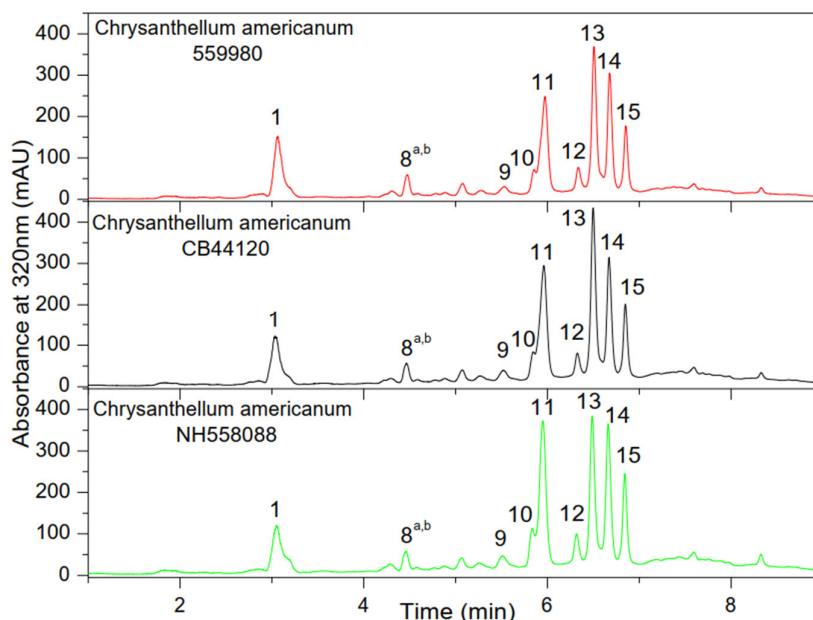

**Figure S6.** Example of electropherograms showing the inhibitory effect of two extracts on hyaluronidase. EPG (1) enzymatic assay occurred normally in absence of plant extracts. Electropherograms number 2 and 4 correspond to raw aqueous extracts (b1 and f2, respectively) confirming the absence of interferents with tetrasaccharide (peak A), the final product of HA hydrolysis. Electropherograms number 3 and 5 are respectively the enzymatic reactions carried out in the presence of plant extracts b1 and f2. Reaction mixture in IB of control:  $0.2 \text{ mg mL}^{-1}$  hyaluronidase and  $0.8 \text{ mg mL}^{-1}$  HA. Modulation of hyaluronidase activity experimental conditions:  $0.2 \text{ mg mL}^{-1}$  hyaluronidase,  $0.8 \text{ mg mL}^{-1}$  HA and  $1 \text{ mg mL}^{-1}$  of filtered raw extract. Incubation at  $37^\circ\text{C}$  for 180 minutes. IB:  $2 \text{ mM}$  sodium acetate (pH 4.3). Electrophoretic separation conditions: BGE:  $50 \text{ mM}$  ammonium acetate (pH 8.9); anodic injection:  $1.5 \text{ psi}$  for  $5 \text{ s}$ ; separation:  $+15 \text{ kV}$  at  $25^\circ\text{C}$ ; detection:  $\lambda = 200 \text{ nm}$ ; rinse between analyses at  $30 \text{ psi}$ :  $5 \text{ min NaOH (1 M)}$ ,  $0.5 \text{ min water}$  and  $3 \text{ min BGE}$ ; bare-silica capillary:  $57 \text{ cm}$  total length,  $47 \text{ cm}$  detection length,  $50 \mu\text{m}$  i.d. Peaks identification: electroosmotic flow (EOF,  $t_m = 7.3 \text{ min}$ ), peak A: tetrasaccharide ( $t_m = 13.5 \text{ min}$ ), peak B: hexasaccharide, peak C: octasaccharide, Hyaluronic acid (HA,  $t_m = 17 \text{ min}$ ). All peaks were identified by CE-HRMS [1].



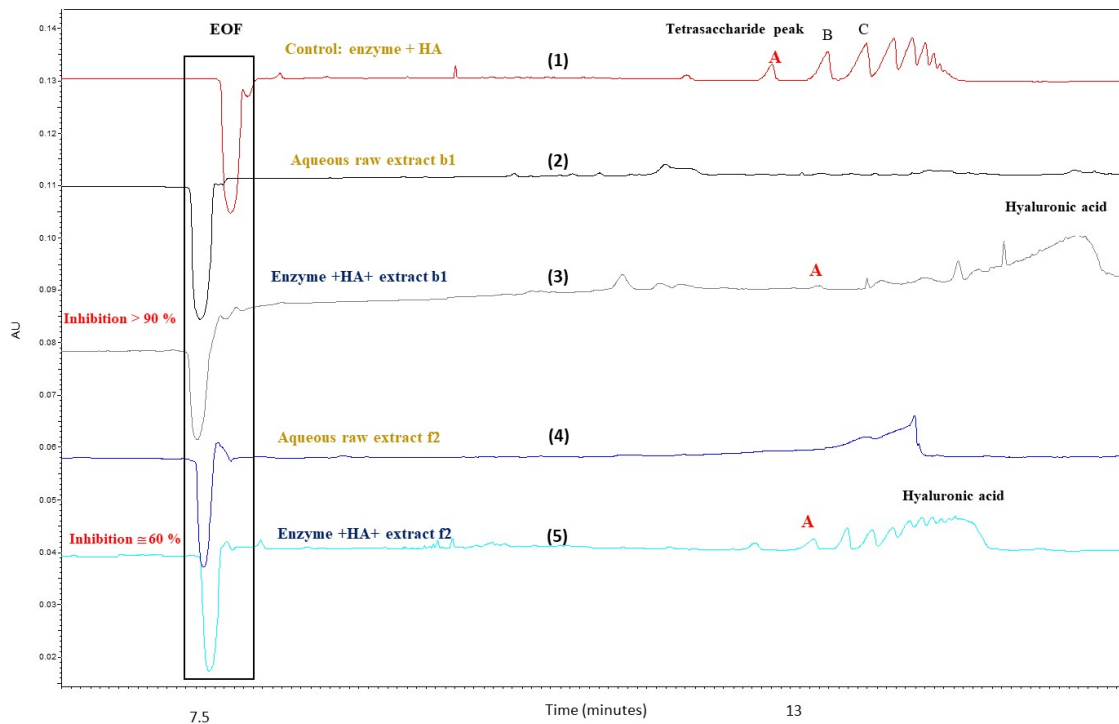

**Figure S7.** Decreasing temperature profiles vs time for different volumes of water (corresponding to a mug 250 mL or a bowl 405 mL) in the French-press Bodum® container with or without added ice in the container. At each 3 min  $\pm$  10 s, 4 min  $\pm$  10 s, 5 min  $\pm$  10 s, one piece of ice (ice mass = 23.4  $\pm$  1.5g) was added into the Bodum® container. Error bars are  $\pm$  one SD on  $n=3$  repetitions of independent extractions. The French-press Bodum® container was left open on the top and under stirring. Lines are only guides for the eyes.

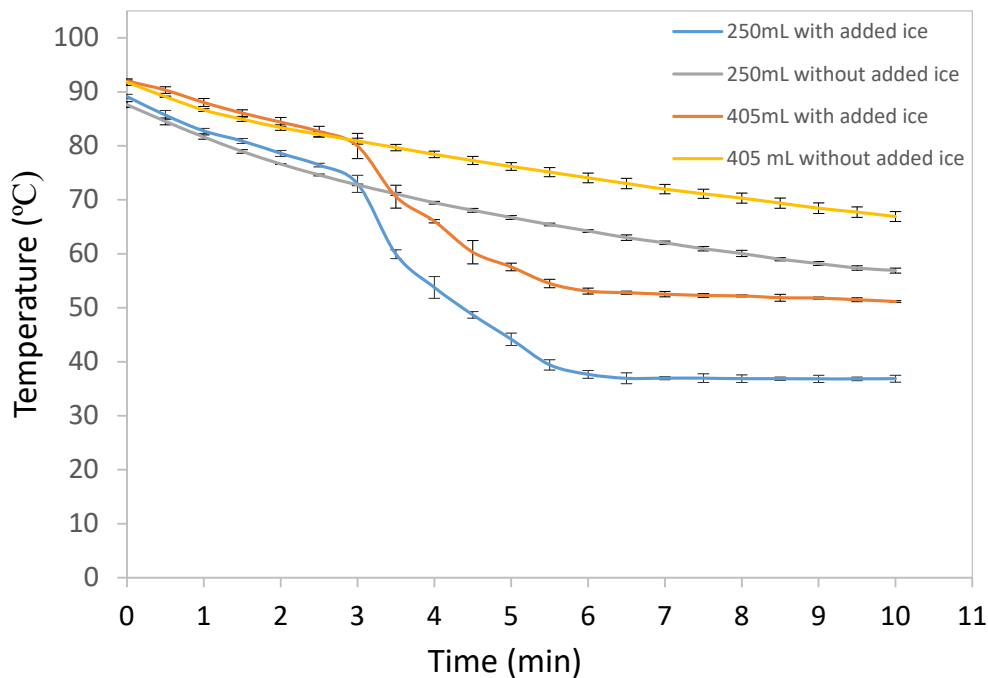

**Table S1.** Some species putatively assigned to *m/z* peaks observed specifically in BC, CA and HAW samples but also commonly observed in all the samples analyzed by ESI(-) FT-ICR MS. Peaks of highest intensity are selected and putative assignment is based on identical molecular formulae achieved by ESI(-) FT-ICR MS and of identified compounds in *Crataegus*. Names in bold are species identified by UHPLC-DAD.

|                    | <i>m/z</i>  | Assignment                               | Candidate compound                                          | Candidate compound  | Category              | Ref. |
|--------------------|-------------|------------------------------------------|-------------------------------------------------------------|---------------------|-----------------------|------|
| <b>BC specific</b> | 329.175898  | C20H26O4                                 | Carnosol                                                    | [M-H] <sup>-</sup>  | Diterpene             |      |
|                    | 331.191497  | C20H28O4                                 | Carnosic acid                                               | [M-H] <sup>-</sup>  | Diterpene             |      |
|                    | 335.090313  | C14H20O7                                 | Salidroside                                                 | [M+Cl] <sup>-</sup> |                       | [2]  |
|                    | 341.043368  | C15H14O7                                 | (+)-Galocatechin                                            | [M+Cl] <sup>-</sup> | Flavonoid             | [3]  |
|                    | 343.082382  | C18H16O7                                 | Cirsilineol                                                 | [M-H] <sup>-</sup>  | Flavonoid             |      |
|                    | 345.170802  | C20H26O5                                 | Rosmanol                                                    | [M-H] <sup>-</sup>  | Diterpene             |      |
|                    | 347.075052  | C11H20O10                                | Vicianose                                                   | [M+Cl] <sup>-</sup> | Disaccharide          |      |
|                    | 347.186439  | C20H28O5                                 | Gibberellin A53/A14/A15                                     | [M-H] <sup>-</sup>  |                       | [4]  |
|                    | 351.018013  | C15H12O8S                                | 5,7,4'-Trihydroxyflavanone 7-sulfate                        | [M-H] <sup>-</sup>  | Flavonoid             |      |
|                    | 365.064481  | C13H19O10P                               | Salicin 6-phosphate                                         | [M-H] <sup>-</sup>  |                       |      |
|                    | 383.163030  | C20H28O5                                 | Gibberellin A53/A14/A15                                     | [M+Cl] <sup>-</sup> |                       | [4]  |
|                    | 399.157945  | C20H28O6                                 | Phorbol                                                     | [M+Cl] <sup>-</sup> | Diterpene             |      |
|                    | 589.192423  | C29H34O13                                | Matteuorientate B                                           | [M-H] <sup>-</sup>  | Flavonoid             |      |
|                    | 601.119838  | C28H26O15                                | (2S)-5,7,3',4'-Tetrahydroxyflavanone 7-(6-galloylglucoside) | [M-H] <sup>-</sup>  | Flavonoid             |      |
|                    | 609.124844  | C30H26O14                                | Galocatechin-(4α->8)-epigallocatechin                       | [M-H] <sup>-</sup>  | Flavonoid             | [5]  |
|                    | 629.127747  | C27H30O15                                | Kaempferol 3-rhamnosyl-(1->2)-galactoside                   | [M+Cl] <sup>-</sup> | Flavonoid             |      |
|                    | 635.125281  | C28H28O17                                | Acacetin 7-glucuronosyl-(1->2)-glucuronide                  | [M-H] <sup>-</sup>  | Flavonoid             |      |
| 645.101553         | C30H26O14   | Quercetin 3-(2"-p-coumarylglucoside)     | [M+Cl] <sup>-</sup>                                         | Flavonoid           |                       |      |
| 663.192874         | C31H36O16   | Pectolarigenin 7-(4"-acetylrutinoside)   | [M-H] <sup>-</sup>                                          | Flavonoid           |                       |      |
| 695.146424         | C30H32O19   | Quercetin 3-(6"-malonylneohesperidoside) | [M-H] <sup>-</sup>                                          | Flavonoid           |                       |      |
| <b>CA specific</b> | 231.06627   | C13H12O4                                 | Goniothalenol                                               | [M-H] <sup>-</sup>  | Lactone               |      |
|                    | 247.1339894 | C15H20O3                                 | Parthenolide                                                | [M-H] <sup>-</sup>  | Sesquiterpene lactone | [6]  |
|                    | 251.1652585 | C15H24O3                                 | Indicumenone                                                | [M-H] <sup>-</sup>  | Ketone                | [7]  |
|                    | 274.129653  | C12H21NO6                                | Glutaryl carnitine                                          | [M-H] <sup>-</sup>  |                       |      |
|                    | 289.104169  | C11H18N2O7                               | N-Succinyl-LL-2,6-diaminoheptanedioate                      | [M-H] <sup>-</sup>  |                       |      |

|              |             |             |                                                                                                                            |                     |                           |        |
|--------------|-------------|-------------|----------------------------------------------------------------------------------------------------------------------------|---------------------|---------------------------|--------|
|              | 317.066697  | C16H14O7    | Lecanoric acid                                                                                                             | [M-H] <sup>-</sup>  | Polyphenol                |        |
|              | 327.051088  | C17H12O7    | (-)-Acanthocarpan                                                                                                          | [M-H] <sup>-</sup>  | Flavonoid derivative      |        |
|              | 330.0322425 | C12H13N3O4S | Acetylsulfamethoxazole                                                                                                     | [M+Cl] <sup>-</sup> |                           |        |
|              | 347.2439396 | C18H36O6    | Sativic acid                                                                                                               | [M-H] <sup>-</sup>  | Fatty acid                |        |
|              | 371.1347112 | C17H24O9    | Syringin                                                                                                                   | [M-H] <sup>-</sup>  | Monosaccharide derivative | [8]    |
|              | 371.2439485 | C20H36O6    | 19(R)-hydroxy-Prostaglandin F1 $\alpha$                                                                                    | [M-H] <sup>-</sup>  | Fatty acid                |        |
|              | 433.0958854 | C26H42O3S   | 1 $\alpha$ ,25-dihydroxy-3-deoxy-3-thiavitamin D3 3-oxide / 1 $\alpha$ ,25-dihydroxy-3-deoxy-3-thiacholecalciferol 3-oxide | [M-H] <sup>-</sup>  |                           |        |
|              | 455.353069  | C30H48O3    | Oleanolic/ursolic acid                                                                                                     | [M-H] <sup>-</sup>  | Triterpene                | [9-11] |
|              | 457.1140505 | C21H20O10   | Vitexin                                                                                                                    | [M+Cl] <sup>-</sup> | Flavonoid                 |        |
|              | 529.135034  | C26H26O12   | Luteolin 3'-methyl ether 7-(6"-crotonylglucoside)                                                                          | [M-H] <sup>-</sup>  | Flavonoid                 |        |
|              | 561.2397738 | C35H34N2O5  | Trilobine ([M-H] <sup>-</sup> )                                                                                            | [M-H] <sup>-</sup>  | Alkaloid                  |        |
|              | 563.1767775 | C27H32O13   | Pinocembrin 7-rhamnosylglucoside                                                                                           | [M-H] <sup>-</sup>  | Flavonoid                 |        |
|              | 609.2838795 | C32H46O9    | Cucurbitacin A                                                                                                             | [M+Cl] <sup>-</sup> | Cholesterol derivative    |        |
|              | 633.2245624 | C24H42O19   | Lactodifucotetraose                                                                                                        | [M-H] <sup>-</sup>  | Polysaccharide            |        |
|              | 725.208519  | C36H38O16   | Licorice glycoside C1/C2                                                                                                   | [M-H] <sup>-</sup>  | Flavonoid                 |        |
| HAW specific | 131.046229  | C4H8O3N2    | Asparagine                                                                                                                 | [M-H] <sup>-</sup>  | Amino acid                | [12]   |
|              | 193.035397  | C6H10O7     | Galacturonic acid                                                                                                          | [M-H] <sup>-</sup>  | Saccharide derivative     | [13]   |
|              | 195.066306  | C10H12O4    | Homoveratric acid                                                                                                          | [M-H] <sup>-</sup>  | Phenol                    |        |
|              | 201.113254  | C10H18O4    | Decanedioic acid                                                                                                           | [M-H] <sup>-</sup>  | Fatty acid                |        |
|              | 203.0826113 | C11H12O2N2  | Tryptophan                                                                                                                 | [M-H] <sup>-</sup>  | Amino acid                | [12]   |
|              | 207.066307  | C11H12O4    | Sinapaldehyde                                                                                                              | [M-H] <sup>-</sup>  | Phenol                    |        |
|              | 210.077208  | C10H13NO4   | 3-Methoxytyrosine                                                                                                          | [M-H] <sup>-</sup>  | Amino acid derivative     |        |
|              | 217.083013  | C8H14N2O5   | Glutamylalanine                                                                                                            | [M-H] <sup>-</sup>  | Dipeptide                 |        |
|              | 355.123586  | C19H25ClO2  | 11 beta-Chloromethylestradiol                                                                                              | [M+Cl] <sup>-</sup> | Cholesterol derivative    |        |
|              | 369.067285  | C12H18O13   | Digalacturonic acid                                                                                                        | [M-H] <sup>-</sup>  | Disaccharide              | [13]   |
|              | 387.040652  | C17H17ClO6  | Griseofulvin                                                                                                               | [M+Cl] <sup>-</sup> | Dibenzofuran              |        |
|              | 409.023334  | C17H14O10S  | Quercetin 3,7-dimethyl ether 4'-sulfate                                                                                    | [M-H] <sup>-</sup>  | Flavonoid                 |        |
|              | 473.072564  | C22H18O12   | Chicoric acid                                                                                                              | [M-H] <sup>-</sup>  | Phenol                    |        |

|            |            |                                                                                              |                     |                                 |
|------------|------------|----------------------------------------------------------------------------------------------|---------------------|---------------------------------|
| 515.226281 | C21H41O12P | 1-dodecanoyl-glycero-3-phospho-(1'-myo-inositol)                                             | [M-H] <sup>-</sup>  | Monoacylglycero phosphoinositol |
| 537.192084 | C33H30O7   | 8-trans-[2-(6-Benzoyloxy-4-hydroxy-2-methoxy-3-methylphenyl)ethenyl]-5-methoxyflavan-7-ol    | [M-H] <sup>-</sup>  | Flavonoid                       |
| 613.132937 | C27H30O14  | Kaempferol 3-rhamnoside-(1->2)-rhamnoside                                                    | [M+Cl] <sup>-</sup> | Flavonoid                       |
| 663.156574 | C30H32O17  | Apigenin 7-(6''-malonylneohesperidoside)                                                     | [M-H] <sup>-</sup>  | Flavonoid                       |
| 725.193469 | C32H38O19  | Schaftoside 6''-O-glucoside                                                                  | [M-H] <sup>-</sup>  | Flavonoid                       |
| 737.193737 | C33H38O19  | Kaempferol 7-methyl ether 3-[3-hydroxy-3-methylglutaryl-(1->6)]-[apiosyl-(1->2)-galactoside] | [M-H] <sup>-</sup>  | Flavonoid                       |
| 769.198376 | C37H38O18  | Isovitexin 2''-O-(6'''-feruloyl)glucoside                                                    | [M-H] <sup>-</sup>  | Flavonoid                       |

|                 | <i>m/z</i> | Assignment | Candidate compound                          | Adduct             | Category       | Ref.   |
|-----------------|------------|------------|---------------------------------------------|--------------------|----------------|--------|
| Common features | 132.030259 | C4H7O4N    | Aspartatic acid                             | [M-H] <sup>-</sup> | Amino acid     | [9–11] |
|                 | 133.014272 | C4H6O5     | Malic acid                                  | [M-H] <sup>-</sup> | Organic acid   | [9–11] |
|                 | 137.024450 | C7H6O3     | Protocatechuic aldehyde/hydroxybenzoic acid | [M-H] <sup>-</sup> | Phenol         | [9–11] |
|                 | 146.045903 | C5H9O4N    | Glutamic acid                               | [M-H] <sup>-</sup> | Amino acid     | [9–11] |
|                 | 153.019355 | C7H6O4     | Protocatechuic acid                         | [M-H] <sup>-</sup> | Phenol         | [9–11] |
|                 | 163.040092 | C9H8O3     | Coumaric acid                               | [M-H] <sup>-</sup> | Coumaric acid  | [9–11] |
|                 | 179.035004 | C9H8O4     | Caffeic acid                                | [M-H] <sup>-</sup> | Caffeic acid   | [9–11] |
|                 | 179.056137 | C6H12O6    | Glucose/fructose/Inositol                   | [M-H] <sup>-</sup> | Monosaccharide | [9–11] |
|                 | 181.071782 | C6H14O6    | Sorbitol                                    | [M-H] <sup>-</sup> | Monosaccharide | [9–11] |
|                 | 188.035337 | C10H7O3N   | alpha-Cyano-4-hydroxycinnamic acid (HCCA)   | [M-H] <sup>-</sup> | Phenol         | [9–11] |
|                 | 191.019742 | C6H8O7     | Citric acid                                 | [M-H] <sup>-</sup> | Organic acid   | [9–11] |
|                 | 191.056085 | C7H12O6    | Quinic acid                                 | [M-H] <sup>-</sup> | Phenol         | [9–11] |
|                 | 193.050666 | C10H10O4   | Ferulic acid                                | [M-H] <sup>-</sup> | Phenol         | [9–11] |
|                 | 223.061189 | C11H12O5   | Sinapinic acid                              | [M-H] <sup>-</sup> | Phenol         | [9–11] |
|                 | 285.040487 | C15H10O6   | Kaempferol/Cyanidin (-2H-)                  | [M-H] <sup>-</sup> | Flavonoid      | [9–11] |

|            |           |                                                                                             |    |                    |                      |        |
|------------|-----------|---------------------------------------------------------------------------------------------|----|--------------------|----------------------|--------|
| 289.071827 | C15H14O6  | Catechin/epicatechin                                                                        |    | [M-H] <sup>-</sup> | Flavonoid            | [9-11] |
| 301.035432 | C15H10O7  | Quercetin                                                                                   |    | [M-H] <sup>-</sup> | Flavonoid            | [9-11] |
| 315.051075 | C16H12O7  | Sexangularetin                                                                              |    | [M-H] <sup>-</sup> | Flavonoid            | [9-11] |
| 331.067100 | C13H16O10 | Galloylglucose                                                                              |    | [M-H] <sup>-</sup> | Tannin               | [9-11] |
| 341.109006 | C12H22O11 | Sucrose                                                                                     |    | [M-H] <sup>-</sup> | Saccharide           | [9-11] |
| 353.087829 | C16H18O9  | <b>Chlorogenic acid / 5-O-Caffeoylquinic acid</b>                                           |    | [M-H] <sup>-</sup> | Phenol<br>derivative | [9-11] |
| 417.082718 | C20H18O10 | Kaempferol-O-arabinoside (crataegide)                                                       |    | [M-H] <sup>-</sup> | Flavonoid            | [9-11] |
| 431.098376 | C21H20O10 | Vitexin/Isovitexin/Apigenin-C-hexoside/Kaempferol<br>pentoside                              | O- | [M-H] <sup>-</sup> | Flavonoid            | [9-11] |
| 447.093308 | C21H20O11 | Orientin/Luteolin-C-hexoside/ <b>Maritimetin-6-O-<br/>glucoside/Kaempferol-3-O-hexoside</b> |    | [M-H] <sup>-</sup> | Flavonoid            | [9-11] |
| 449.108966 | C21H22O11 | <b>Eriodictyol 7-O-glucoside/Isookanin-7-O-glucoside</b>                                    |    | [M-H] <sup>-</sup> | Flavonoid            | [9-11] |
| 461.072579 | C21H18O12 | <b>Luteolin-7-O-glucuronide</b>                                                             |    | [M-H] <sup>-</sup> | Flavonoid            | [9-11] |
| 461.108994 | C22H22O11 | Methyluteolin-C-hexoside/Methoxykaempferol-pentoside                                        |    | [M-H] <sup>-</sup> | Flavonoid            | [9-11] |
| 463.088240 | C21H20O12 | <b>Hyperoside/Isoquercetin/Spiraeoside</b>                                                  |    | [M-H] <sup>-</sup> | Flavonoid            | [9-11] |
| 477.103886 | C22H22O12 | Sexangularetin 3-O-glucoside                                                                |    | [M-H] <sup>-</sup> | Flavonoid            | [9-11] |
| 489.103836 | C23H22O12 | O-Acetylorientin                                                                            |    | [M-H] <sup>-</sup> | Flavonoid            | [9-11] |
| 505.098780 | C23H22O13 | Quercetin-O-acetyl hexoside                                                                 |    | [M-H] <sup>-</sup> | Flavonoid            | [9-11] |
| 515.119522 | C25H24O12 | <b>Dicaffeoylquinic acid</b>                                                                |    | [M-H] <sup>-</sup> | Phenol               | [9-11] |
| 533.093590 | C24H22O14 | <b>Kaempferol-malonylglucoside</b>                                                          |    | [M-H] <sup>-</sup> | Flavonoid            | [9-11] |
| 563.104079 | C25H24O15 | Sexangularetin 3-O-(malonyl)glucoside                                                       |    | [M-H] <sup>-</sup> | Flavonoid            | [9-11] |
| 577.156128 | C27H30O14 | Iso/vitexin rhamnoside                                                                      |    | [M-H] <sup>-</sup> | Flavonoid            | [9-11] |
| 593.151052 | C27H30O15 | <b>Kaempferol-3-O-neohesperidoside/Iso/Orientin</b><br>rhamnoside                           | O- | [M-H] <sup>-</sup> | Flavonoid            | [9-11] |

|            |           |                                                                      |                                       |                    |           |        |
|------------|-----------|----------------------------------------------------------------------|---------------------------------------|--------------------|-----------|--------|
| 609.145975 | C27H30O16 | <b>Rutin/Quercetin-3-O-rhamnosylgalactoside/Quercetin rutinoside</b> | 3-                                    | [M-H] <sup>-</sup> | Flavonoid | [9–11] |
| 623.161612 | C28H32O16 | Sexangularetin methylpentosylhexoside                                | 3-neohesperidoside/Metoxyxykaempferol | [M-H] <sup>-</sup> | Flavonoid | [9–11] |
| 625.140986 | C27H30O17 | <b>6,8-Diglucosylapigenin</b>                                        |                                       | [M-H] <sup>-</sup> | Flavonoid | [9–11] |

**Table S2.** Inhibition assays of hyaluronidase and ACE as well as the ABTS antioxidant capacity assay of the different plant extracts. For the enzymes inhibition assays, the plant extracts were screened at 1 mg mL<sup>-1</sup> and the inhibition percentages of hyaluronidase and ACE were calculated according to Eq.2 and Eq.3, respectively. The antioxidant capacities of the plant extracts were determined at 0.01 mg mL<sup>-1</sup> and calculated according to Eq.4. The absorbance of the multi-well plates was read twice for the ACE inhibition and ABTS antioxidant capacity assays. All assays were carried out in triplicates (n=3). Plant extracts were obtained from HAW (#1/#2, grinded 1 mm and #1/#2, grinded 'fine'), BC (#1/#2, grinded 'fine') and CA (#1/#2, grinded 'fine'). \*EGCG, hyaluronidase referenced inhibitor, and Trolox, an antioxidant reference, were used to validate the methods. n.r.= Not relevant.

|                                    | Identification | Average hyaluronidase inhibition ± SD (%) ; n=3 | Average ACE inhibition ± SD (%) ; n=3 |           | Average reduction of ABTS absorbance ± SD (%) ; n=3<br>(Antioxidant Assay) |           |
|------------------------------------|----------------|-------------------------------------------------|---------------------------------------|-----------|----------------------------------------------------------------------------|-----------|
|                                    |                |                                                 | (Read #1)                             | (Read #2) | (Read #1)                                                                  | (Read #2) |
| Hyaluronidase Referenced inhibitor | EGCG*          | 100 %                                           | n.r.                                  | n.r.      | n.r.                                                                       | n.r.      |
| Reference antioxidant compound     | Trolox*        | n.r.                                            | n.r.                                  | n.r.      | 64 ± 2                                                                     | 64 ± 2    |
| Hawthorn                           | n°20335, #1    | 96 ± 1                                          | 89 ± 2                                | 89 ± 2    | 45 ± 1                                                                     | 45 ± 1    |

|                                   |               |        |        |        |        |        |
|-----------------------------------|---------------|--------|--------|--------|--------|--------|
| flowering tops<br>(HAW)           | n°20335, #2   | 97 ± 2 | 81 ± 4 | 82 ± 4 | 45 ± 0 | 45 ± 0 |
|                                   | n°CB58120, #1 | 97 ± 1 | 91 ± 2 | 92 ± 2 | 34 ± 3 | 34 ± 3 |
|                                   | n°CB58120, #2 | 93 ± 1 | 88 ± 1 | 88 ± 1 | 28 ± 0 | 29 ± 0 |
| Blackcurrant leaves<br>(BC)       | n°55870, #1   | 64 ± 2 | 76 ± 0 | 76 ± 0 | 58 ± 1 | 58 ± 1 |
|                                   | n°55870, #2   | 64 ± 3 | 73 ± 5 | 72 ± 5 | 64 ± 2 | 64 ± 2 |
| Chrysanthellum<br>americanum (CA) | n°559980, #1  | 61 ± 2 | 96 ± 2 | 97 ± 2 | 19 ± 2 | 19 ± 2 |
|                                   | n°559980, #2  | 59 ± 1 | 91 ± 2 | 91 ± 2 | 22 ± 0 | 22 ± 1 |

## References

1. Fayad, S.; Nehmé, R.; Langmajerová, M.; Ayela, B.; Colas, C.; Maunit, B.; Jacquinet, J.C.; Vibert, A.; Lopin-Bon, C.; Zdeněk, G.; et al. Hyaluronidase reaction kinetics evaluated by capillary electrophoresis with UV and high-resolution mass spectrometry (HRMS) detection. *Anal. Chim. Acta* **2017**, *951*, 140–150.
2. Tung, Y.T.; Wu, M.F.; Lee, M.C.; Wu, J.H.; Huang, C.C.; Huang, W.C. Antifatigue activity and exercise performance of phenolic-rich extracts from calendula officinalis, ribes nigrum, and vaccinium myrtillus. *Nutrients* **2019**, *11*, 1715.
3. Karunaratne, D.N.; Pamunuwa, G. Food Additives. In: BoD – Books on Demand, 2017.
4. Hess, D. Plant physiology: Molecular, biochemical, and physiological fundamentals of metabolism and development. In: Springer Science & Business Media, 2012.
5. Tits, M.; Angenot, L.; Poukens, P.; Warin, R.; Dierckxsens, Y. Prodelphinidins from *Ribes nigrum*. *Phytochemistry* **1992**, *31*, 971–973.
6. Blakeman, J.P.; Atkinson, P. Antimicrobial properties and possible rôle in host-pathogen interactions of parthenolide, a sesquiterpene lactone isolated from glands of *Chrysanthemum parthenium*. *Phyiol. Plant Pathol.* **1979**, *15*, 183–190.
7. Mladenova, K.; Tsankova, E.; Kostova, I.; Stoianova-Ivanova, B. Indicumenone, A New Bisabolane Ketodiol from *Chrysanthemum indicum*. *Planta Med.* **1987**, *53*, 118–119.
8. Wei, Q.; Ji, X. ying; Long, X. shun; Li, Q. rong; Yin, H. Chemical Constituents from Leaves of “Chuju” *Chrysanthemum morifolium* and Their Antioxidant Activities in vitro. *Zhong yao cai* **2015**, *38*, 305–310.
9. Liu, P.; Yang, B.; Kallio, H. Characterization of phenolic compounds in Chinese hawthorn (*Crataegus pinnatifida* Bge. var. major) fruit by high performance liquid chromatography-electrospray ionization mass spectrometry. *Food Chem.* **2010**, *121*, 1188–1197.
10. Liu, P.; Kallio, H.; Yang, B. Phenolic compounds in hawthorn (*Crataegus grayana*) fruits and leaves and changes during fruit ripening. *J. Agric. Food Chem.* **2011**, *59*, 11141–11149.
11. Liu, P. Composition of hawthorn (*Crataegus* spp.) fruits and leaves and emblic leaf flower (*Phyllanthus emblica*) fruits, University of Turku, 2012.
12. McKenna, D.J.; Jones, K.; Hughes, K.; Tyler, V.M. *Botanical medicines: the desk reference for major herbal supplements*; Routledge, 2002;
13. Zhu, R.; Hong, M.; Zhuang, C.; Zhang, L.; Wang, C.; Liu, J.; Duan, Z.; Shang, F.; Hu, F.; Li, T.; et al. Pectin oligosaccharides from hawthorn (*Crataegus pinnatifida* Bunge. Var. major) inhibit the formation of advanced glycation end products in infant formula milk powder. *Food Funct.* **2019**, *10*, 8081–8093.
